# Supplementary material
Source: publisher figshare collection journal article supplement (https://sage.figshare.com/ndownloader/files/16218323)
Supplement: Supplementary file 1 [file 16218323]

## References

*One asterisk means a study was included for descriptive coding only. Two asterisks mean the study was included in descriptive and outcomes coding. Note that this indicates at least one comparison in the source was coded for outcomes, not necessarily that all comparisons were.*

- \*Ackerlund Brandt, J. A., Weinkauff, S., Zeug, N., & Klatt, K. P. (2016). An evaluation of constant time delay and simultaneous prompting procedures in skill acquisition for young children with Autism. *Education and Training in Autism and Developmental Disabilities, 51*, 55-66.
- \*Addison, L. (2006). An examination of the differential outcomes effect when teaching discriminations to children with autism and other developmental disabilities (Doctoral dissertation, Louisiana State University).
- \*Akmanoglu, N., Kurt, O., & Kapan, A. (2015). Comparison of simultaneous prompting and constant time delay procedures in teaching children with autism the responses to questions about personal information. *Educational Sciences: Theory and Practice, 15*, 723-737.
- \*\*Apple, A. L. (2005). A comparison of the use of constant time delay alone and constant time delay with instructive feedback to teach children with autism to discriminate stimuli by function, feature, and class. ProQuest Dissertations & Theses Global. (305421964).
- \*\*Ault, M. J., Gast, D. L., & Wolery, M. (1988). Comparison of progressive and constant time-delay procedures in teaching community-sign word reading. *American Journal on Mental Retardation, 92*, 44-56.
- \*Ault, M. J., Wolery, M., Gast, D. L., Doyle, P. M., & Martin, C. P. (1990). Comparison of predictable and unpredictable trial sequences during small-group instruction. *Learning Disability Quarterly, 13*, 12-29.
- \*\*Bennett, D. L., Gast, D. L., Wolery, M., & Schuster, J. (1986). Time delay and system of least prompts: A comparison in teaching manual sign production. *Education and Training of the Mentally Retarded, 21*, 117-129.
- \*Bertsch, K. M. (2002). A comparison of one-to-one and small group instruction for young children with autism: focus on effective teaching and behavior management. ProQuest Dissertations & Theses Global. (305501301).
- \*\*Boulware, G. (2001). A comparison of simultaneous and most -to -least prompting procedures in teaching receptive identification of pictures to toddlers with autism. ProQuest Dissertations & Theses Global. (250778791).
- \*\*Boutain, A. R. (2012). A comparison of graduated guidance and simultaneous prompting in teaching receptive language skills to children with autism. ProQuest Dissertations & Theses Global. (1034439160).
- \*\*Call, N. (2013). The effects of intertrial intervals on receptive tasks for young children with autism (Doctoral dissertation, University of Kansas).
- \*\*Carroll, R. A., Joachim, B. T., St Peter, C. C., & Robinson, N. (2015). A comparison of error-correction procedures on skill acquisition during discrete-trial instruction. *Journal of Applied Behavior Analysis, 48*, 257-273. doi: 10.1002/jaba.205
- \*Carroll, R. A., Kodak, T., & Adolf, K. J. (2016). Effect of delayed reinforcement on skill acquisition during discrete-trial instruction: Implications for treatment-integrity errors in

- academic settings. *Journal of Applied Behavior Analysis*, 49, 176-181. doi: 10.1002/jaba.268
- \*\*Carroll, R. A., Kodak, T., & Fisher, W. W. (2013). An evaluation of programmed treatment-integrity errors during discrete-trial instruction. *Journal of Applied Behavior Analysis*, 46, 379-394. doi: 10.1002/jaba.49
- \*Casey, S. D. (2008). A comparison of within-and across-session progressive time delay procedures for teaching sight words to individuals with cognitive delays. *The Behavior Analyst Today*, 9, 162.
- \*Celik, S., & Vuran, S. (2014). Comparison of direct instruction and simultaneous prompting procedure on teaching concepts to individuals with intellectual disability. *Education and Training in Autism and Developmental Disabilities*, 49, 127-144.
- \*\*Cengher, M., Shamoun, K., Moss, P., Roll, D., Feliciano, G., & Fienup, D. M. (2016). A comparison of the effects of two prompt-fading strategies on skill acquisition in children with autism spectrum disorders. *Behavior Analysis in Practice*, 9, 115-125. doi: 10.1007/s40617-015-0096-6
- \*Cividini-Motta, C. (2014). Teaching verbal behavior: A systematic comparison of commonly used echoic teaching procedures (Doctoral dissertation, Western New England University).
- \*Clark, C. P. (2000). The differential effects of simplified speech versus typical speech on response accuracy in discrete trial teaching formats with prekindergarten age students with autism (Doctoral dissertation, Florida Atlantic University).
- \*\*Clements, A. (2014). An evaluation of the effect of attention during descriptive praise on skill acquisition during discrete trial instruction (Master's Thesis, University of Nebraska at Omaha).
- \*Collins, B. C., Evans, A., Creech-Galloway, C., Karl, J., & Miller, A. (2007). Comparison of the acquisition and maintenance of teaching functional and core content sight words in special and general education settings. *Focus on Autism and Other Developmental Disabilities*, 22, 220-233. doi: 10.1177/10883576070220040401
- \*\*Colozzi, G. A., Ward, L. W., & Crotty, K. E. (2008). Comparison of simultaneous prompting procedure in 1: 1 and small group instruction to teach play skills to preschool students with pervasive developmental disorder and developmental disabilities. *Education and Training in Developmental Disabilities*, 43, 226-248.
- \*Davis, M. (2011). Comparison of massed trial instruction vs. activity-based instruction using simultaneous prompting with young children who are at risk. (Doctoral Dissertation, University of Kentucky).
- \*Day, H. (1987). Comparison of two prompting procedures to facilitate skill acquisition among mentally retarded adolescents. *American Journal of Mental Deficiency*, 92, 366-372.
- \*Dittlinger, L. H., & Lerman, D. C. (2011). Further analysis of picture interference when teaching word recognition to children with autism. *Journal of Applied Behavior Analysis*, 44, 341-349. doi: 10.1901/jaba.2011.44-341
- \*Dufour, M. M., & Lanovaz, M. J. (2017). Comparing two methods to promote generalization of receptive identification in children with autism spectrum disorders. *Developmental Neurorehabilitation*, 20, 463-474.
- \*Fentress, G. M., & Lerman, D. C. (2012). A comparison of two prompting procedures for teaching basic skills to children with autism. *Research in Autism Spectrum Disorders*, 6, 1083-1090. doi: 10.1016/j.rasd.2012.02.006

- \*Ferkis, M. A., Belfiore, P. J., & Skinner, C. H. (1997). The effects of response repetitions on sight word acquisition for students with mild disabilities. *Journal of Behavioral Education*, 7, 307-324.
- \*Fossett, B., & Mirenda, P. (2006). Sight word reading in children with developmental disabilities: A comparison of paired associate and picture-to-text matching instruction. *Research in Developmental Disabilities*, 27, 411-429. doi: 10.1016/j.ridd.2005.05.006
- \*Gard, M. (2012). An evaluation of sight word instruction procedures for children with autism: Interspersed trial training (Doctoral dissertation, University of Kansas).
- \*Geiger, K. B., Carr, J. E., LeBlanc, L. A., Hanney, N. M., Polick, A. S., & Heinicke, M. R. (2012). Teaching receptive discriminations to children with autism: a comparison of traditional and embedded discrete trial teaching. *Behavior Analysis in Practice*, 5, 49-59. doi: 10.1007/BF03391823
- \*\*George, P. R. (1997). A comparison of group and individual written attentional responses to enhance targeted, observational and incidental learning of social studies facts in a middle school, inclusion setting. ProQuest Dissertations & Theses Global. (304343500).
- \*\*Godby, S., Gast, D. L., & Wolery, M. (1987). A comparison of time delay and system of least prompts in teaching object identification. *Research in Developmental Disabilities*, 8, 283-305. doi: 10.1016/0891-4222(87)90009-6
- \*\*Gorgan, E. M. (2017). Assessing treatment options for pre-existing prompt dependence in children with developmental disabilities (Doctoral dissertation, University of Wisconsin – Milwaukee).
- \*Griffen, A. K., Schuster, J. W., & Morse, T. E. (1998). The acquisition of instructive feedback: A comparison of continuous versus intermittent presentation schedules. *Education and Training in Mental Retardation and Developmental Disabilities*, 33, 42-61.
- \*Grow, L. L., Kodak, T., & Clements, A. (2017). An evaluation of instructive feedback to teach play behavior to a child with autism spectrum disorder. *Behavior Analysis in Practice*, 10, 313-317.
- \*\*Harrell, P. L. (1990). A comparison of the efficiency of interdependent and independent group contingencies with mildly handicapped elementary-aged students concepts using time delay instructional procedures (Doctoral dissertation, University of Kentucky).
- \*\*Hawkins, S. R. (2008). Embedding constant time delay instruction to teach discrete tasks to preschool children who have significant disabilities in a one to one and small group format: a comparison study (Doctoral dissertation, University of Kentucky).
- \*\*Head, K. D., Collins, B. C., Schuster, J. W., & Ault, M. J. (2011). A comparison of simultaneous prompting and constant time delay procedures in teaching state capitals. *Journal of Behavioral Education*, 20, 182-202. doi: 10.1007/s10864-011-9127-8
- \*Henrickson, M. L., Rapp, J. T., & Ashbeck, H. A. (2015). Teaching with massed versus interspersed trials: Effects on acquisition, maintenance, and problem behavior. *Behavioral Interventions*, 30, 36-50. doi: 10.1002/bin.1396
- \*Holcombe, A., Wolery, M., & Snyder, E. (1994). Effects of two levels of procedural fidelity of constant time delay on children's learning. *Journal of Behavioral Education*, 4, 49-73. doi: 10.1007/BF01560509
- \*\*Humphreys, T., Polick, A. S., Howk, L. L., Thaxton, J. R., & Ivancic, A. P. (2013). An evaluation of repeating the discriminative stimulus when using least-to-most prompting to teach intraverbal behavior to children with autism. *Journal of Applied Behavior Analysis*, 46, 534-538. doi: 10.1002/jaba.43

- \*Ingvarsson, E. T., & Hollobaugh, T. (2011). A comparison of prompting tactics to establish intraverbals in children with autism. *Journal of Applied Behavior Analysis*, 44, 659-664.
- \*Ingvarsson, E., & Le, D. (2011). Further evaluation of prompting tactics for establishing intra-verbal responding in children with autism. *The Analysis of Verbal Behavior*, 27, 75-93.
- \*Iacono, T. A. (1990). A comparison of unimodal and multimodal augmentative communication language intervention techniques for children with intellectual disabilities (Doctoral dissertation, University of Nebraska).
- \*Jameson, J. M., McDonnell, J., Johnson, J. W., Riesen, T. J., & Polychronis, S. (2007). A comparison of one-to-one embedded instruction in the general education classroom and one-to-one massed practice instruction in the special education classroom. *Education and Treatment of Children*, 30, 23-44.
- \*Joachim, B. T., & Carroll, R. A. (2018). A comparison of consequences for correct responses during discrete-trial instruction. *Learning and Motivation*, 62, 15-28.
- \*Johnson, P., Schuster, J., & Bell, J. K. (1996). Comparison of simultaneous prompting with and without error correction in teaching science vocabulary words to high school students with mild disabilities. *Journal of Behavioral Education*, 6, 437-458. doi: 10.1007/BF02110516
- \*\*Julien, H. M., & Reichle, J. (2016). A comparison of high and low dosages of a component of milieu teaching strategies for two preschool-age learners with autism spectrum disorder. *Language, Speech, and Hearing Services in Schools*, 47, 87-98. doi: 10.1044/2015\_LSHSS-15-0035
- \*Kodak, T., Fuchtman, R., & Paden, A. (2012). A comparison of intraverbal training procedures for children with autism. *Journal of Applied Behavior Analysis*, 45, 155-160.
- \*\*Leaf, J. B., Alcalay, A., Leaf, J., Tsuji, K., Kassardjian, A., Dale, S., ... & Leaf, R. (2016). Comparison of most-to-least to error correction for teaching receptive labelling for two children diagnosed with autism. *Journal of Research in Special Educational Needs*, 16, 217-225. doi: 10.1111/1471-3802.12067
- \*\*Leaf, J. B., Cihon, J. H., Ferguson, J. L., McEachin, J., Leaf, R., & Taubman, M. (2018). Evaluating three methods of stimulus rotation when teaching receptive labels. *Behavior Analysis in Practice*, 11, 1-16. doi: 10.1007/s40617-018-0249-5
- \*\*Leaf, J. B., Leaf, J. A., Alcalay, A., Kassardjian, A., Tsuji, K., Dale, S., ... & Leaf, R. (2016). Comparison of most-to-least prompting to flexible prompt fading for children with autism spectrum disorder. *Exceptionality*, 24, 109-122. doi: 10.1080/09362835.2015.1064419
- \*\*Leaf, J. B., Leaf, R., Taubman, M., McEachin, J., & Delmolino, L. (2014). Comparison of flexible prompt fading to error correction for children with autism spectrum disorder. *Journal of Developmental and Physical Disabilities*, 26, 203-224. doi: 10.1007/s10882-013-9354-0
- \*\*Leaf, J. B., Sheldon, J. B., & Sherman, J. A. (2010). Comparison of simultaneous prompting and no-no prompting in two-choice discrimination learning with children with autism. *Journal of Applied Behavior Analysis*, 43, 215-228. doi: 10.1901/jaba.2010.43-215
- \*\*Leaf, J. B., Townley-Cochran, D., Mitchell, E., Milne, C., Alcalay, A., Leaf, J., ... & Oppenheim-Leaf, M. L. (2016). Evaluation of multiple-alternative prompts during tact training. *Journal of Applied Behavior Analysis*, 49, 399-404. doi: 10.1002/jaba.289
- \*\*Leaf, J. B., Tsuji, K. H., Lentell, A. E., Dale, S. E., Kassardjian, A., Taubman, M., ... & Oppenheim-Leaf, M. L. (2013). A comparison of discrete trial teaching implemented in a

- one-to-one instructional format and in a group instructional format. *Behavioral Interventions*, 28, 82-106. doi: 10.1002/bin.1357
- \*Ledford, J. R., Barton, E., Hardy, J., Elam, K., Seabolt, J., Shanks, M., ... & Kaiser, A. (2016). What equivocal data from single case comparison studies reveal about evidence-based practices in early childhood special education. *Journal of Early Intervention*, 38, 79-91. doi: 10.1177/1053815116648000
- \*\*Ledford, J. R., Chazin, K. T., Harbin, E. R., & Ward, S. E. (2017). Massed trials versus trials embedded into game play: Child outcomes and preference. *Topics in Early Childhood Special Education*, 37, 107-120. doi: 10.1177/0271121417704703
- \*\*Majdalany, L., Wilder, D., Greif, A., Mathisen, D., & Saini, V. (2014). Comparing massed-trial instruction, distributed-trial instruction, and task interspersal to teach tacts to children with autism spectrum disorders. *Journal of Applied Behavior Analysis*, 47, 657-662. doi: 10.1002/jaba.149
- \*\*Majdalany, L., Wilder, D. A., Smeltz, L., & Lipschultz, J. (2016). The effect of brief delays to reinforcement on the acquisition of tacts in children with autism. *Journal of Applied Behavior Analysis*, 49, 411-415. doi: 10.1002/jaba.282
- \*McDonnell, J., Johnson, J. W., Polychronis, S., Riesen, T., Kercher, K., & Jameson, M. (2006). Comparison of one-to-one embedded instruction in general education classes with small group instruction in special education classes. *Education and Training in Developmental Disabilities*, 41, 125-138.
- \*McGhan, A., & Lerman, D. C. (2013). Assessment of error-correction procedures for learners with autism. *Journal of Applied Behavior Analysis*, 46, 626-639. doi: 10.1002/jaba.65
- \*Nopprapun, M., & Holloway, J. (2014). A comparison of fluency training and discrete trial instruction to teach letter sounds to children with ASD: Acquisition and learning outcomes. *Research in Autism Spectrum Disorders*, 8, 788-802.
- \*O'Neill, S.J., McDowell, C., & Leslie, C.J. (2018). A comparison of prompt delays with trial-and-error instruction in conditional discrimination training. *Behavior Analysis in Practice*. doi: 10.1007/s40617-018-0261-9
- \*Odluyurt, S., Tekin-Iftar, E., & Adalioglu, I. (2012). Does treatment integrity matter in promoting learning among children with developmental disabilities? *Topics in Early Childhood Special Education*, 32, 143-150. doi: 10.1177/0271121410394208
- \*\*Owisany, J.M. (2017). An evaluation of the effects of treatment integrity errors on skill acquisition during discrete-trial instruction (Master's thesis, University of West Virginia University)
- \*Parker, E.D. (2009). Tact repertoires and measures of efficiency: comparing the effects of two behavioral intervention models with students with developmental disabilities (Doctoral dissertation, The Ohio State University).
- \*Pesantez, R. (2012). Comparing prompt delay and total communication for training vocal intraverbals in children with autism. Dissertations & Theses Global. (1251630647).
- \*\*Polick, A.S. (2011). An investigation of general and descriptive praise in teaching language to children with autism (Doctoral dissertation, Auburn University).
- \*Polychronis, S. C., McDonnell, J., Johnson, J. W., Riesen, T., & Jameson, M. (2004). A comparison of two trial distribution schedules in embedded instruction. *Focus on Autism and Other Developmental Disabilities*, 19, 140-151. doi: 10.1177/10883576040190030201

- \*\*Pufpaff, L. A., Blischak, D. M., & Lloyd, L. L. (2000). Effects of modified orthography on the identification of printed words. *American Journal on Mental Retardation*, 105, 14-24.
- \*Ramirez, S.R. (2017). Comparing the efficacy of picture card stimuli to storybook stimuli in teaching morphologic structures to children with expressive language disorders (Master's thesis, California State University).
- \*\*Reichow, B., & Wolery, M. (2011). Comparison of progressive prompt delay with and without instructive feedback. *Journal of Applied Behavior Analysis*, 44, 327-340. doi: 10.1901/jaba.2011.44-327
- \*Riesen, T., McDonnell, J., Johnson, J. W., Polychronis, S., & Jameson, M. (2003). A comparison of constant time delay and simultaneous prompting within embedded instruction in general education classes with students with moderate to severe disabilities. *Journal of Behavioral Education*, 12, 241-259. doi: 10.1023/A:1026076406656
- \*Roest, E.R. (2008). A comparative study of the effects of fluency training and discrete trial training on the acquisition, stimulus generalization and retention of noun labels in children with autism (Doctoral dissertation, University of Connecticut).
- \*Schlosser, R.W., Sigafoos, J., Luiselli, J.K., Angermeier, K., Harasymowycz, U., Schooley, K., & Belfiore, P.J. (2007). Effects of synthetic speech output on requesting and natural speech production in children with autism: A preliminary study. *Research in Autism Spectrum Disorders*, 1, 139-163. doi:10.1016/j.rasd.2006.
- \*\*Schuster, J. W., Griffen, A. K., & Wolery, M. (1992). Comparison of simultaneous prompting and constant time delay procedures in teaching sight words to elementary students with moderate mental retardation. *Journal of Behavioral Education*, 2, 305-325. doi: 10.1007/BF00948820
- \*\*Shook, S. L. (1999). Teaching children with autism to ask questions in integrated preschool settings: a comparison of constant and progressive time delay (Doctoral dissertation, University of Washington).
- \*\*Singleton, D. K., Schuster, J. W., Morse, T. E., & Collins, B. C. (1999). A comparison of antecedent prompt and test and simultaneous prompting procedures in teaching grocery words to adolescents with mental retardation. *Education and Training in Mental Retardation and Developmental Disabilities*, 34, 182-199.
- \*Smith, S. L. (2016). Comparing error correction procedures: Incorporating effective and efficient teaching with learner preference (Doctoral dissertation, Temple University).
- \*Soluaga, D., Leaf, J. B., Taubman, M., McEachin, J., & Leaf, R. (2008). A comparison of flexible prompt fading and constant time delay for five children with autism. *Research in Autism Spectrum Disorders*, 2, 753-765. doi: 10.1016/j.rasd.2008.03.005
- \*\*Spino, M. A. (2013). The effects of two schedules of instruction with constant time delay on the receptive word learning skills of preschool children with developmental delays. (Doctoral dissertation, The University of Toledo).
- \*Swain, R., Lane, J. D., & Gast, D. L. (2015). Comparison of constant time delay and simultaneous prompting procedures: Teaching functional sight words to students with intellectual disabilities and autism spectrum disorder. *Journal of Behavioral Education*, 24, 210-229. doi: 10.1007/s10864-014-9209-5
- \*\*Tekin, E., & Kircaali-Iftar, G. (2002). Comparison of the effectiveness and efficiency of two response prompting procedures delivered by sibling tutors. *Education and Training in Mental Retardation and Developmental Disabilities*, 37, 283-299.

- \*\*Toussaint, K. A., Kodak, T., & Vladescu, J. C. (2016). An evaluation of choice on instructional efficacy and individual preferences among children with autism. *Journal of Applied Behavior Analysis*, 49, 170-175. doi: 10.1002/jaba.263
- \*Valentino, A. L., Shillingsburg, M. A., & Call, N. A. (2012). Comparing the effects of echoic prompts and echoic prompts plus modeled prompts on intraverbal behavior. *Journal of Applied Behavior Analysis*, 45, 431-435. doi: 10.1901/jaba.2012.45-431
- \*Vedora, J., Meunier, L., & Mackay, H. (2009). Teaching intraverbal behavior to children with autism: A comparison of textual and echoic prompts. *The Analysis of Verbal Behavior*, 25, 79-86. doi: 10.1007/BF03393072
- \*Vedora, J., & Conant, E. (2015). A comparison of prompting tactics for teaching intraverbals to young adults with autism. *The Analysis of Verbal Behavior*, 31, 267-276. doi: 10.1007/s40616-015-0030-6
- \*Vladescu, J. C., & Kodak, T. M. (2013). Increasing instructional efficiency by presenting additional stimuli in learning trials for children with autism spectrum disorders. *Journal of Applied Behavior Analysis*, 46, 805-816. doi: 10.1002/jaba.70
- \*Volkert, V., Lerman, D., Trosclair, N., Addison, L., & Kodak, T. (2008). An exploratory analysis of task-interspersal procedures for teaching object labels to children with autism. *Journal of Applied Behavior Analysis*, 41, 335-350. doi: 10.1901/jaba.2008.41-335
- \*Wallace, A. M., Bechtel, D. R., Heatter, S., & Barry, L. M. (2016). A comparison of prompting strategies to teach intraverbals to an adolescent with down syndrome. *The Analysis of Verbal Behavior*, 32, 225-232. doi: 10.1007/s40616-016-0058-2
- \*\*Waugh, R. E., Alberto, P., & Fredrick, L. (2011). Effects of error correction during assessment probes on the acquisition of sight words for students with moderate intellectual disabilities. *Research in Developmental Disabilities*, 32, 47-57. doi: 10.1016/j.ridd.2010.08.007
